# Supplementary material for: A wear and heat-resistant hydrophobic fluoride-free coating based on modified nanoparticles and waterborne-modified polyacrylic resin
Source: Royal Society of Chemistry journal article supplement (doi:10.1039/d2ra07237h), 2023-01-01
Supplement: d2ra07237h1.pdf [file d2ra07237h1.pdf]

## Supporting Information

# A wear and heat resistant hydrophobic coating based on modified nanoparticles and waterborne-modified polyacrylic resin

*Bin Yu<sup>a</sup>, Huicong Liu<sup>\*a</sup>, Haining Chen<sup>a</sup>, Weiping Li<sup>a</sup>, Liqun Zhu<sup>a</sup>, Weitao Liang<sup>\*a</sup>*

a. School of Materials Science and Engineering, Beihang University, No. 37 Xueyuan Road, Haidian District, Beijing 100191, People's Republic of China.

\*Corresponding emails: [liuhc@buaa.edu.cn](mailto:liuhc@buaa.edu.cn); [lwt@buaa.edu.cn](mailto:lwt@buaa.edu.cn)

## 1. Supplementary results:

Table S1. Orthogonal Experiment 1

|   | BA(g) | Initiator(g) | solvent(mL) | ST(g) |
|---|-------|--------------|-------------|-------|
| 1 | 6     | 1            | 100         | 7     |
| 2 | 1.5   | 0.1          | 25          | 1.75  |
| 3 | 24    | 10           | 400         | 28    |

  

| Experiment number | BA | Initiator | solvent | ST | Value |
|-------------------|----|-----------|---------|----|-------|
| 1                 | 1  | 1         | 1       | 1  | 0     |
| 2                 | 1  | 2         | 2       | 2  | 5     |
| 3                 | 1  | 3         | 3       | 3  | 3     |
| 4                 | 2  | 1         | 2       | 3  | 0     |
| 5                 | 2  | 2         | 3       | 1  | 1     |
| 6                 | 2  | 3         | 1       | 2  | 0     |
| 7                 | 3  | 1         | 3       | 2  | 2     |
| 8                 | 3  | 2         | 1       | 3  | 4     |
| 9                 | 3  | 3         | 2       | 1  | 6     |
| T <sub>1j</sub>   | 8  | 2         | 4       | 7  |       |
| T <sub>2j</sub>   | 1  | 10        | 11      | 7  |       |
| T <sub>3j</sub>   | 12 | 9         | 6       | 7  |       |
| R <sub>j</sub>    | 11 | 8         | 7       | 0  |       |

factor importance ranking: BA、Initiator、solvent、ST

best combination:BA<sub>3</sub>、Initiator<sub>2</sub>、solvent<sub>2</sub>、ST<sub>2</sub>

Evaluation standard: according to the slope of the fitting curve of the material (mass percentage of loss per unit friction circle)

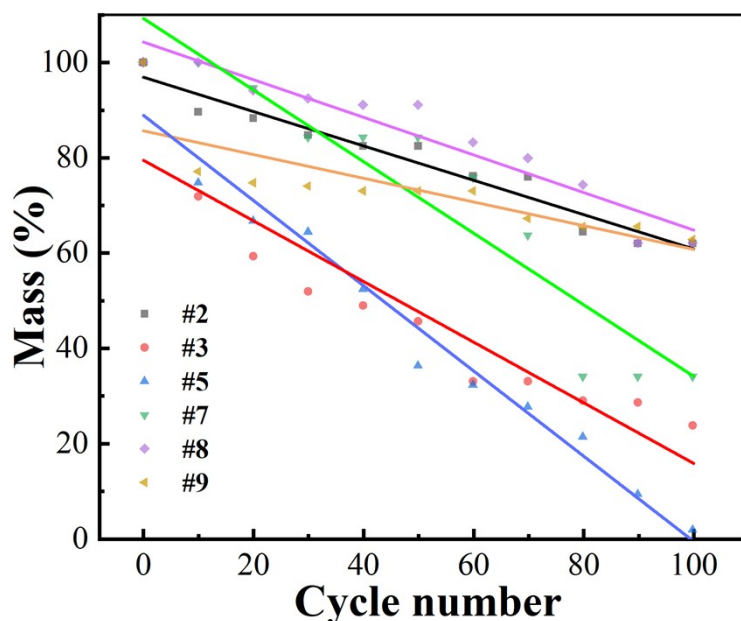

**Figure S1.** The friction experiment diagram of orthogonal experiment 1

There are six groups of data in the figure.S1, missing # 1, # 4 and # 6, because the three groups of test schemes cannot form a normal film during the preparation of the coating. It can be considered that the preparation scheme cannot synthesize normal acrylic resin. Therefore, the assignment in the orthogonal experiment table is 0.

**Table S2.** Orthogonal Experiment 2

|   | Solvent(mL) | Initiator(g) | AA(g) | HEMA(g) |
|---|-------------|--------------|-------|---------|
| 1 | 15          | 0.1          | 0.8   | 0.4     |
| 2 | 25          | 0.3          | 4     | 2       |
| 3 | 40          | 0.5          | 20    | 10      |

| Experiment number | Solvent | Initiator | AA | HEMA | Value |
|-------------------|---------|-----------|----|------|-------|
| 1                 | 1       | 1         | 1  | 1    | 0     |
| 2                 | 1       | 2         | 2  | 2    | 4     |
| 3                 | 1       | 3         | 3  | 3    | 0     |
| 4                 | 2       | 1         | 2  | 3    | 0     |
| 5                 | 2       | 2         | 3  | 1    | 0     |

|          |   |   |   |    |   |
|----------|---|---|---|----|---|
| 6        | 2 | 3 | 1 | 2  | 2 |
| 7        | 3 | 1 | 3 | 2  | 5 |
| 8        | 3 | 2 | 1 | 3  | 3 |
| 9        | 3 | 3 | 2 | 1  | 1 |
| $T_{1j}$ | 4 | 5 | 5 | 1  |   |
| $T_{2j}$ | 2 | 7 | 5 | 11 |   |
| $T_{3j}$ | 9 | 3 | 5 | 3  |   |
| $R_j$    | 7 | 4 | 0 | 10 |   |

factor importance ranking: HEMA、Initiator、Solvent、AA

best combination: HEMA<sub>2</sub>、Initiator<sub>2</sub>、Solvent<sub>3</sub>、AA<sub>1</sub>

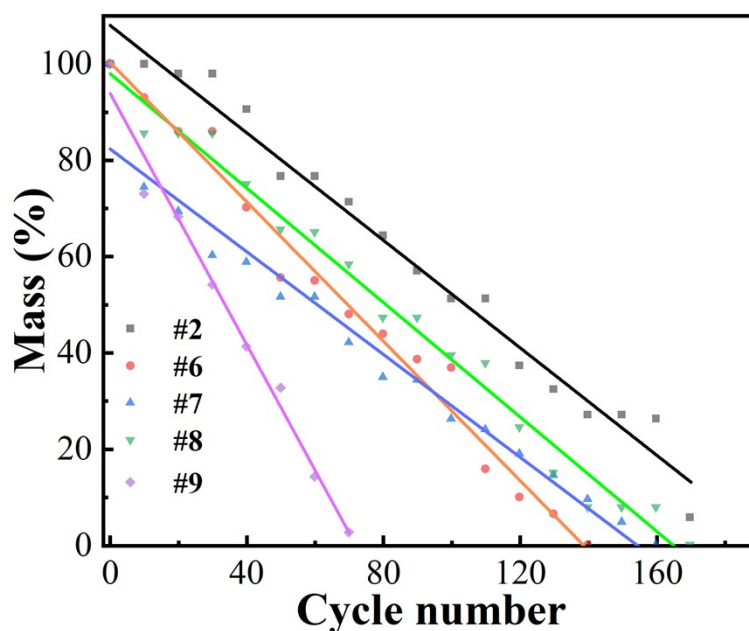

**Figure S2.** The friction experiment diagram of orthogonal experiment 2

There are five groups of data in the figure.S2, missing # 1, # 3, # 4, # 5, because the four groups of test schemes cannot form a normal film during the preparation of the coating. It can be considered that the preparation scheme cannot synthesize normal acrylic resin. Therefore, the assignment in the orthogonal experiment table is 0.

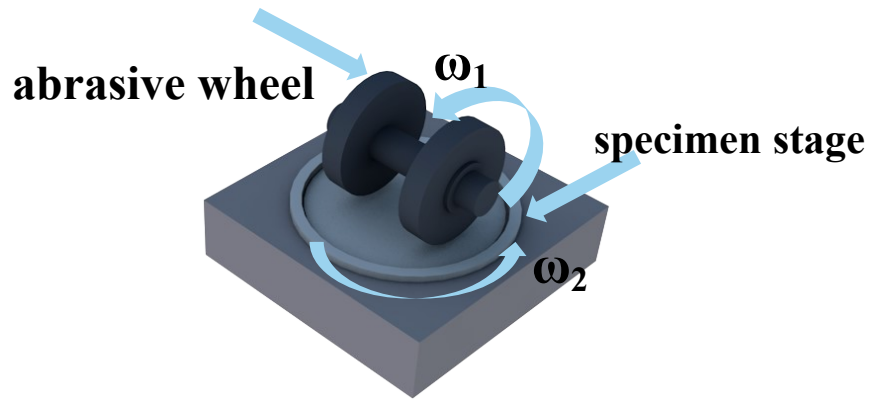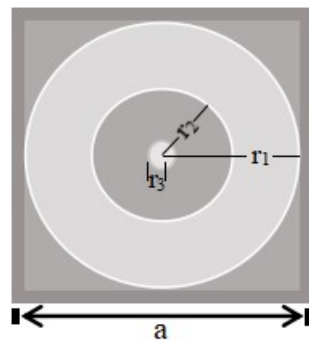

Figure S3. Schematic diagram of friction test

Calculation formula of friction area:

$$S_f = \pi \times (r_1^2 - r_2^2) \quad (1)$$

The mass calculation formula of friction area:

The coating is uniform, then  $\frac{\text{mass of friction area}}{\text{mass of the coating}} = \frac{\text{friction area}}{\text{coating area}},$

So  $M_f = (S_f \div S_c) \times M_c$

$$= \frac{\pi \times (r_1^2 - r_2^2)}{a^2 - \pi r_3^2} \times M_c \quad (2)$$

In the experiment,  $M_f = 9.97\% M_c$

**Table S3.**Fitting results of wear tests

| Figure            | Sample   | Fitting result     |
|-------------------|----------|--------------------|
| <b>Figure S1</b>  | #2       | $y=96.9-0.3604x$   |
|                   | #3       | $y=79.5-0.6360x$   |
|                   | #5       | $y=88.9-0.8940x$   |
|                   | #7       | $y=109.2-0.7510x$  |
|                   | #8       | $y=104.3-0.3945x$  |
|                   | #9       | $y=85.7-0.2487x$   |
| <b>Figure S2</b>  | #2       | $y=108.0-0.5577x$  |
|                   | #6       | $y=100.3-0.7233x$  |
|                   | #7       | $y=82.3-0.5333x$   |
|                   | #8       | $y=98.0-0.5938x$   |
|                   | #9       | $y=93.9-1.3044x$   |
| <b>Figure 6.a</b> | ZJ1 best | $y=100.6-0.3759x$  |
|                   | ZJ2 best | $y=90.1-0.7628x$   |
| <b>Figure 6.b</b> | ZJ1 best | $y=100.6-0.3759x$  |
|                   | 1:15     | $y=87.4-0.2082x$   |
|                   | 1:10     | $y=92.5-0.3444x$   |
|                   | 1:5      | $y=90.9-0.1500x$   |
|                   | 1:3      | $y=96.7-0.9950x$   |
|                   | 1:1      | $y=88.8-3.3818x$   |
| <b>Figure 6.c</b> | 1:1      | $y=-0.93x+99.52$   |
|                   | 1:3      | $y=-0.68x+91.05$   |
|                   | 1:5      | $y=-0.529x+100.03$ |
|                   | 1:10     | $y=-0.57x+85.0$    |
|                   | 1:15     | $y=-0.535x+84.89$  |

|                   |          |                  |
|-------------------|----------|------------------|
| <b>Figure 6.d</b> | 1:1      | $y=-1.19x+64.7$  |
|                   | 1:3      | $y=-1.06x+87.4$  |
|                   | 1:5      | $y=-0.42x+85.6$  |
|                   | 1:10     | $y=-0.79x+74.6$  |
|                   | 1:15     | $y=-0.76x+110.4$ |
| <b>Figure 6.f</b> | ZJ2 best | $y=90.1-0.76x$   |
|                   | 1:15     | $y=75.7-0.34x$   |
|                   | 1:10     | $y=87.1-0.63x$   |
|                   | 1:5      | $y=83.5-0.86x$   |
|                   | 1:3      | $y=86.3-5x$      |
|                   | 1:1      | $y=101.4-2.30x$  |
| <b>Figure 6.g</b> | 1:1      | $y=-2.43x+93.0$  |
|                   | 1:3      | $y=-2.04x+96.3$  |
|                   | 1:5      | $y=-1.30x+93.0$  |
|                   | 1:10     | $y=-1.22x+96.4$  |
|                   | 1:15     | $y=-0.78x+90.5$  |
| <b>Figure 6.h</b> | 1:1      | $y=-0.94x+89.7$  |
|                   | 1:3      | $y=-1.07x+98.4$  |
|                   | 1:5      | $y=-0.76x+99.3$  |
|                   | 1:10     | $y=-0.69x+97.9$  |
|                   | 1:15     | $y=-0.45x+73.6$  |

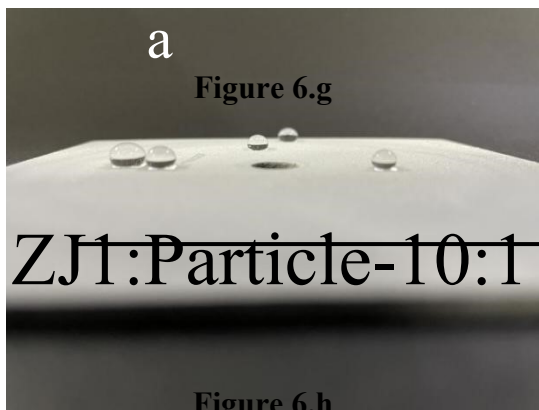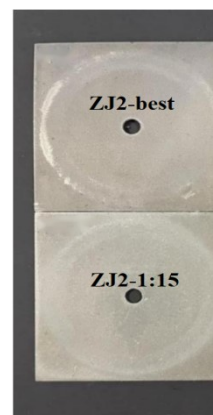

**Figure S4.** (a).Picture of water droplets on composite coating (b).Photos of samples after wear

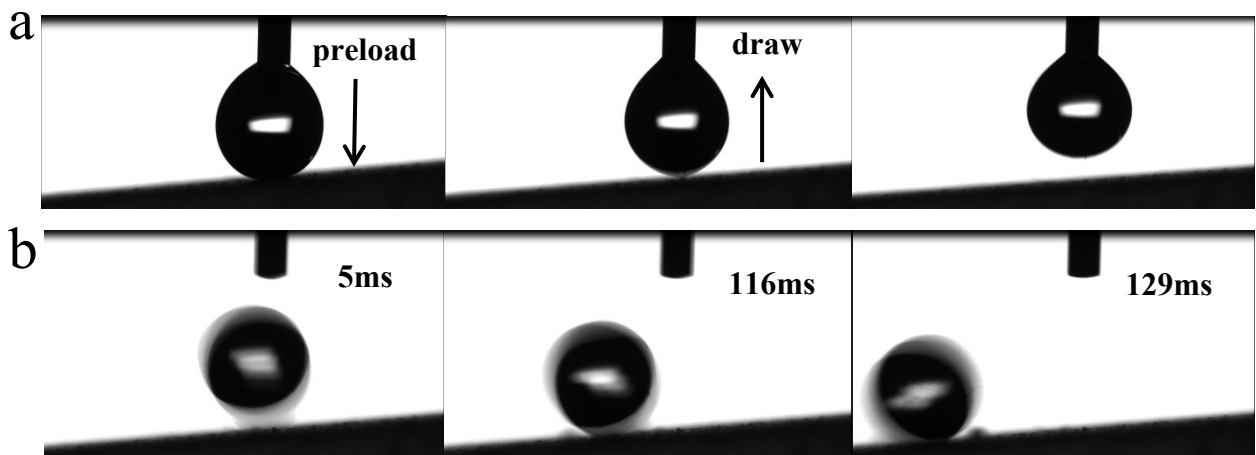

**Figure S5.** (a). Time-resolved images of a 7.0  $\mu\text{L}$  water droplet spreading quickly on the composite coating within 129ms (tilting angle  $< 5^\circ$ ). (b). The contact, deformation and departure processes of a water droplet on the composite coating.
